# Supplementary material for: Comparison of Different Signal Peptides for the Efficient Secretion of the Sweet-Tasting Plant Protein Brazzein in Pichia pastoris
Source: MDPI journal article supplement (doi:10.3390/life11010046), 2021-01-13
Supplement: s1 [file s1]

Supplementary Materials

# Comparison of Different Signal Peptides for the Efficient Secretion of the Sweet-Tasting Plant Protein Brazzein in *Pichia pastoris*

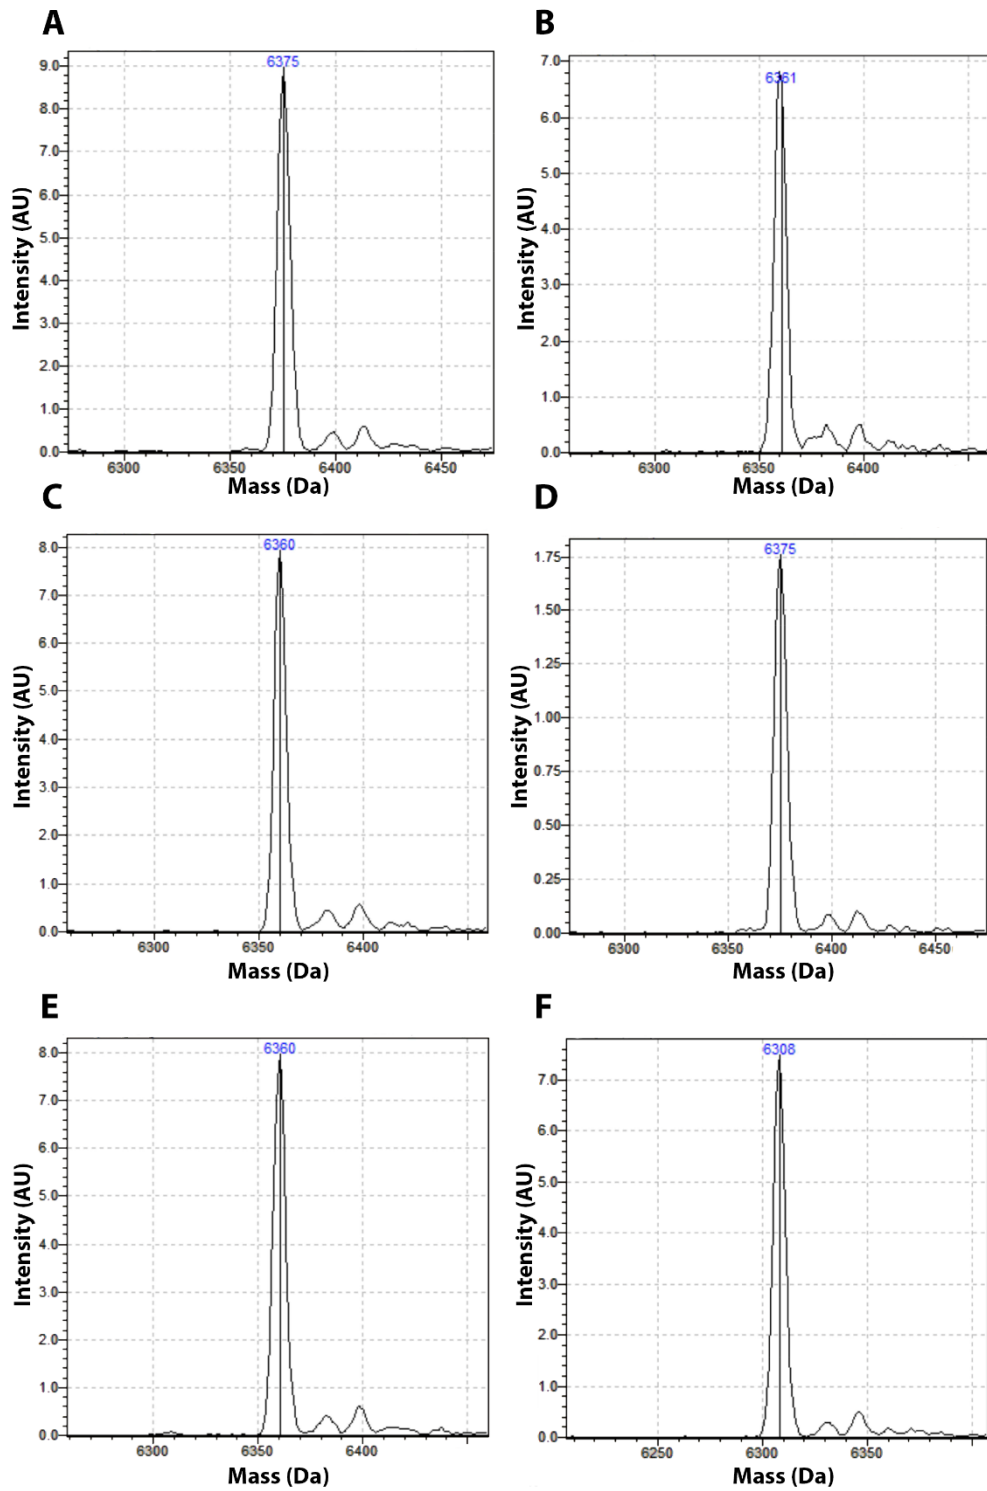

**Figure S1.** Mass spectra analyses of the 6 purified brazzein proteins. The calculated masses are indicated on the top of the main peak for each brazzein proteins resulting from the pAA-bra (A), pAE-bra (B), pAI-bra (C), pAL-bra (D), pAS-bra (E), pAV-bra (F) constructs.
